# Supplementary material
Source: PubMed Central journal article supplement (PMC3500784)
Supplement: NIHMS420234-supplement-01.pdf [file NIHMS420234-supplement-01.pdf]

## SUPPLEMENTAL TABLE

**Table S1** TaqMan™ primer and probe (FAM labeled) sequences employed for real-time quantitative PCR to determine allele copy numbers for *HPS6* and surrounding genomic areas in DNA from patients HPS51 and HPS107 (see Figure 1f for genomic location of the assays)

| Target area       | Primers and Probes      | Sequence (5'-3')                           | HPS51 allele number | HPS107 allele number |
|-------------------|-------------------------|--------------------------------------------|---------------------|----------------------|
| <i>ORF67</i> ex1  | ORF67ex1-F              | ATGATGATGGGCCATTGGATGT                     | 2                   | 2                    |
|                   | ORF67ex1-R              | TGTCTCATAGGCTTCACACCAAAA                   |                     |                      |
|                   | ORF67ex1-probe          | CAGTGCCGGTGTCTACT                          |                     |                      |
| <i>HPS6</i> 5UTRa | <i>HPS6</i> 5UTRa-F     | GTCCAACCTCTCCTTTTCAGTGTGTA                 | 2                   | 2                    |
|                   | <i>HPS6</i> 5UTRa-R     | GCAACTTCTAGGAAAGATACAGAGTGAT               |                     |                      |
|                   | <i>HPS6</i> 5UTRa-probe | CCTCTGACAGTTAACCTAC                        |                     |                      |
| <i>HPS6</i> 5UTRb | <i>HPS6</i> 5UTRb-F     | CGGCATACGCAGCTTCAG                         | 2                   | 2                    |
|                   | <i>HPS6</i> 5UTRb-R     | CCCCGAGGCGGTTCTG                           |                     |                      |
|                   | <i>HPS6</i> 5UTRb-probe | CTCCCTCCCTCTCCCC                           |                     |                      |
| <i>HPS6</i> 5UTRc | <i>HPS6</i> 5UTRc-F     | CCAAGGCCAATCCCTCTTTATGAG                   | 2                   | 1                    |
|                   | <i>HPS6</i> 5UTRc-R     | CAGTGAAACAGAAATGGATGCAAGT                  |                     |                      |
|                   | <i>HPS6</i> 5UTRc-probe | TCCCCGGCCCCCTACCT                          |                     |                      |
| <i>HPS6</i> ex1A* | <i>HPS6</i> ex1A-F      | Unknown (Hs00544576_s1)*                   | 2                   | 1                    |
|                   | <i>HPS6</i> ex1A-R      | Unknown (Hs00544576_s1)*                   |                     |                      |
|                   | <i>HPS6</i> ex1A-probe  | Targeting <i>HPS6</i> nt.763 in NM_024747* |                     |                      |
| <i>HPS6</i> ex1B* | <i>HPS6</i> ex1B-F      | Unknown (Hs00949672_s1)*                   | 2                   | 1                    |
|                   | <i>HPS6</i> ex1B-R      | Unknown (Hs00949672_s1)*                   |                     |                      |
|                   | <i>HPS6</i> ex1B-probe  | Targeting <i>HPS6</i> nt.827 in NM_024747* |                     |                      |
| <i>HPS6</i> 3UTRa | <i>HPS6</i> 3UTRa-F     | AGAACAGTAGCTTGACTCCAGGTA                   | 2                   | 1                    |
|                   | <i>HPS6</i> 3UTRa-R     | AGAACTTGGATGGCCCTTGTC                      |                     |                      |
|                   | <i>HPS6</i> 3UTRa-probe | CCTCAAGCCAGGCTGC                           |                     |                      |
| <i>HPS6</i> 3UTRb | <i>HPS6</i> 3UTRb-F     | GGCCGAGCTCCCTTACTTG                        | 2                   | 1                    |
|                   | <i>HPS6</i> 3UTRb-R     | GGACCAGCTGGACCAAGAG                        |                     |                      |
|                   | <i>HPS6</i> 3UTRb-probe | TTGCTGCCCTGTGTCTG                          |                     |                      |
| <i>HPS6</i> 3UTRc | <i>HPS6</i> 3UTRc-F     | AGGACATATGAGCAGTTACCCAGAT                  | 2                   | 2                    |
|                   | <i>HPS6</i> 3UTRc-R     | GGCACATCAGCACATCAGGTA                      |                     |                      |
|                   | <i>HPS6</i> 3UTRc-probe | AAGGCAACATTCCCC                            |                     |                      |
| <i>LDB1</i> ex9   | LDB1ex9-F               | CAGATCCAGAATACATACCCTTGCA                  | 2                   | 2                    |
|                   | LDB1ex9-R               | TGTCTCATAGGCTTCACACCAAAA                   |                     |                      |
|                   | LDB1ex9-probe           | CAGTGCCGGTGTCTACT                          |                     |                      |

\*Assays-on-demand (pre-manufactured) from Applied Biosystems
